# Supplementary material for: Theoretical study on photo-induced processes of 1-methyl-3-(N-(1,8-naphthalimidyl)ethyl)imidazolium halide species: an application of constrained density functional theory
Source: Royal Society of Chemistry journal article supplement (doi:10.1039/c7cp07877c), 2017-12-08
Supplement: c7cp07877c1.pdf [file c7cp07877c1.pdf]

Supplementary information

for

**Theoretical study on photo-induced process of 1-methyl-3-(N-(1,8-naphthalimidyl)ethyl)imidazolium halide species: an application of constrained density functional theory**

Submitted by

Takao Otsuka,<sup>a,\*</sup> Masato Sumita,<sup>b,c\*</sup> Hironori Izawa,<sup>d</sup> Kenji Morihashi<sup>b</sup>

<sup>a</sup>*Laboratory for Computational Molecular Design, Computational Biology Research Core, RIKEN Quantitative Biology Center (QBiC), QBiC Building B, 6-2-4 Furuedai, Suita, Osaka 565-0874, Japan*

<sup>b</sup>*Department of Chemistry, Graduate School of Pure and Applied Sciences, University of Tsukuba, 1-1-1, Tennodai, Tsukuba, Ibaraki 305-8571, Japan*

<sup>c</sup>*Center for Advanced Intelligence Project, RIKEN AIP-FUJITSU Collaboration Center, RIKEN, Nihonbashi 1-chome Mitsui Building, 15th floor, 1-4-1 Nihonbashi, Chuo-ku, Tokyo, 103-0027, Japan*

<sup>d</sup>*Graduate School of Engineering, Tottori University, 4-101 Koyama-Minami, Tottori 680-8550, Japan.*

Contents:

1. Constraint values for reproducing vertical excitation energies
2. Vertical excitation energy of MNEI-F by another CDFT constraint condition
3. Potential energy surface of MNEI-F by DFT and CDFT
4. Cartesian coordinates at stationary points of each system

## 1. Constraint values for reproducing vertical excitation energies

Experimental  $S_{M1}$  vertical excitation energies can be reproduced by tuning constraint values of CDFT (here, the step of constraint value was used as 0.1). As shown in the Table S1, except for MNEI-F complex, the vertical excitation energies of MNEI-X (X=Cl, Br, I) agree with experimental values (approximately 3.65 eV) by using suitable constraint values. For MNEI-F, we should change the constrain manner in conducting the CDFT calculation. See the next section of this SI.

**Table S1.** Suitable constraint values and relative energies to  $S_0$  Min (optimized at the conventional DFT level)

| <b>MNEI-F</b>               |                   |                         |
|-----------------------------|-------------------|-------------------------|
|                             | Constrained value | $S_{M1}$ / eV ( $E_h$ ) |
| <b><math>S_0</math> Min</b> | IM: 0.0           | 14.34                   |
|                             | F: -1.0           | (-1109.5905)            |
|                             | IM: 0.8           | 9.70                    |
|                             | F: -1.0           | (-1109.7611)            |
| <b>MNEI-Cl</b>              |                   |                         |
|                             | Constrained value | $S_{M1}$                |
| <b><math>S_0</math> Min</b> | IM: 0.0           | 4.96                    |
|                             | Cl: -1.0          | (-1470.3210)            |
|                             | IM: 0.2           | 3.49                    |
|                             | Cl: -1.0          | (-1470.3751)            |
| <b>MNEI-Br</b>              |                   |                         |
|                             | Constrained value | $S_{M1}$                |
| <b><math>S_0</math> Min</b> | IM: 0.0           | 4.51                    |
|                             | Br: -1.0          | (-3584.0329)            |
|                             | IM: 0.1           | 3.75                    |
|                             | Br: -1.0          | (-3584.0607)            |
| <b>MNEI-I</b>               |                   |                         |
|                             | Constrained value | $S_{M1}$                |
| <b><math>S_0</math> Min</b> | IM: 0.0           | 4.11                    |
|                             | I: -1.0           | (-7929.0436)            |
|                             | IM: 0.1           | 3.36                    |
|                             | I: -1.0           | (-7930.0714)            |

## 2. Vertical excitation energy of MNEI-F by another CDFT constraint condition

In order to reproduce the  $S_{M1}$  vertical excited energy of MNEI-F at the CDFT level, we should use the different constraint manner used in the MNEI-X (X = Cl, Br, I); we need to use the constrain manner that the IM group is combined with F as shown in Figure S1.

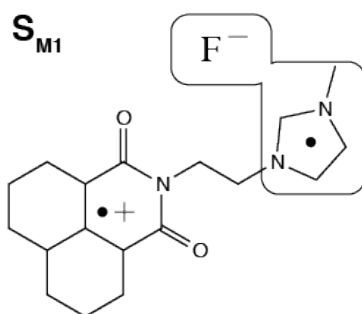

**Figure S1.** Constrain manner to reproduce the experimental value of the  $S_{M1}$  excited energy.

Table S2 shows the vertical excitation energies to the  $S_{M1}$  state of MNEI-F using the constraint shown in Figure S1. The vertical excitation energy of MNEI-F by constraint of one negative charge (IM-F: -1.0) is estimated as 6.25 eV. Furthermore, using the suitable constraint value, the vertical excitation energy is optimized to 3.23 eV, which agrees with the experimental value. However, unfortunately, this constraint manner seems to be invalid because the relaxed structure breaks at the CDFT level with this constraint. Therefore, we did not employ this constraint. Careful selection of constraint area is needed to apply CDFT to the excited state.

**Table S2.** Vertical excited energy to the  $S_{M1}$  state on the  $S_0$  Min of MNEI-F

| MNEI-F    |                   |                         |
|-----------|-------------------|-------------------------|
|           | Constrained value | $S_{M1}$ / eV ( $E_h$ ) |
| $S_0$ Min | IM-F: -1.0        | 6.25                    |
|           |                   | (-1109.8879)            |
|           | IM-F: -0.7        | 3.23                    |
|           |                   | (-1109.9988)            |

### 3. Potential surface of MNEI-F at the DFT and CDFT level

Here we describe the relaxed potential energy surface (PES) of the ground state ( $S_0$ ) as a function of C3-F bond length with vertical points of the charge separate state ( $S_{CS}$ ) and the intermolecular ET state ( $S_{ET}$ ) for MNEI-F. Figure S2 shows the PESs of the  $S_0$ ,  $S_{CS}$ , and  $S_{ET}$  state by DFT and CDFT calculations. As shown in Figure S2,  $S_{ET}$  state is very close to  $S_0$  state, and the energetic difference between  $S_0$  and  $S_{ET}$  states of MNEI-F is relatively small (0.06-1.73 eV). On the other hand,  $S_{CS}$  state show the large energetic differences. Therefore, the  $S_{ET}$  state of MNEI-F can be regarded as the ground state in the MNEI-F system.

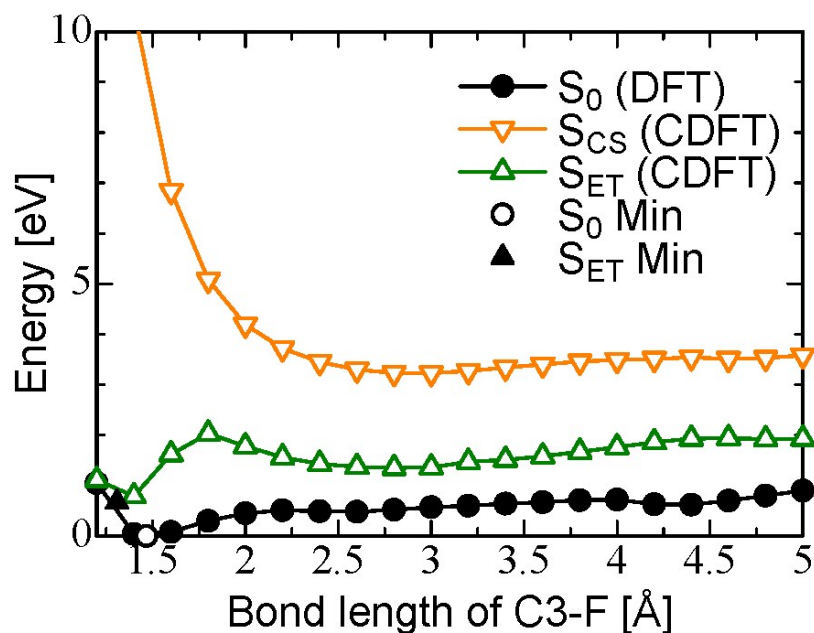

**Figure S2.**  $S_0$  relaxed potential energy surfaces (PESs) as a function of the C3-F distance with vertical points of  $S_{CS}$  and  $S_{ET}$  at the conventional DFT and CDFT levels. Energies are shown in the relative values to  $S_0$  Min.

#### 4. Cartesian coordinates at stationary points of each system

##### 4.1 S<sub>0</sub> Min

MNEI-F

|   |             |             |             |
|---|-------------|-------------|-------------|
| C | 2.30042439  | 1.87308563  | -1.09490324 |
| C | 0.97705237  | 1.56460867  | -0.83317831 |
| C | 0.17888476  | 2.44980166  | -0.06678437 |
| C | 0.74425940  | 3.66093445  | 0.43540961  |
| C | 2.10581819  | 3.94245924  | 0.14886385  |
| C | 2.86577554  | 3.06671882  | -0.59974237 |
| H | 2.88833760  | 1.17882308  | -1.68591417 |
| C | -1.17762091 | 2.14309607  | 0.20228082  |
| C | -0.08185820 | 4.52942604  | 1.19598371  |
| H | 2.54283899  | 4.86264341  | 0.52900092  |
| H | 3.90638762  | 3.29373937  | -0.81179613 |
| C | -1.40173760 | 4.21157262  | 1.44528386  |
| C | -1.95417360 | 3.01331263  | 0.94699814  |
| H | 0.34243042  | 5.45382230  | 1.58019898  |
| H | -2.02296307 | 4.88495679  | 2.02834498  |
| H | -2.99016530 | 2.75287941  | 1.13679365  |
| C | -1.77557553 | 0.89045856  | -0.31704222 |
| C | 0.40294952  | 0.30556035  | -1.36672525 |
| N | -0.93847305 | 0.03921114  | -1.05755527 |
| O | 1.05906429  | -0.46884759 | -2.05464133 |
| O | -2.94796320 | 0.59065377  | -0.12824333 |
| C | -1.56125247 | -1.19387349 | -1.57579204 |
| H | -2.51587150 | -0.89860238 | -2.01484680 |
| H | -0.90791732 | -1.58081916 | -2.35700830 |
| C | -1.82900346 | -2.26659221 | -0.50337806 |
| H | -2.06693290 | -1.78150292 | 0.44977369  |
| H | -2.71976192 | -2.82395488 | -0.81257572 |
| N | -0.76385270 | -3.25742490 | -0.35315253 |
| C | -1.03585590 | -4.44788129 | 0.37104422  |
| C | 0.54722543  | -2.83868480 | 0.02566728  |
| C | 0.10788768  | -4.89964736 | 0.90393891  |
| H | -2.01934721 | -4.89329179 | 0.34827895  |
| H | 1.11531032  | -2.33613571 | -0.75628952 |

|   |            |             |            |
|---|------------|-------------|------------|
| H | 0.31775744 | -5.81804972 | 1.43209514 |
| N | 1.15018578 | -4.01914476 | 0.53497848 |
| C | 2.37960479 | -3.90620580 | 1.29698646 |
| H | 2.23661050 | -3.41286196 | 2.26791438 |
| H | 2.79116334 | -4.90681894 | 1.46173835 |
| H | 3.11043739 | -3.33037468 | 0.72010197 |
| F | 0.46775743 | -1.80498905 | 1.06472805 |

# MNEI-CI

|   |             |             |             |
|---|-------------|-------------|-------------|
| C | 2.28169166  | 1.87078584  | -1.07374252 |
| C | 0.94759999  | 1.58885219  | -0.83935991 |
| C | 0.14149166  | 2.50432807  | -0.11861836 |
| C | 0.71305909  | 3.71779521  | 0.36889622  |
| C | 2.08502096  | 3.97329381  | 0.10980721  |
| C | 2.85115490  | 3.06907162  | -0.59706925 |
| H | 2.87686076  | 1.14942279  | -1.62309151 |
| C | -1.22556392 | 2.22612692  | 0.12690741  |
| C | -0.11569484 | 4.61492396  | 1.09185754  |
| H | 2.52600906  | 4.89535463  | 0.48067302  |
| H | 3.90073027  | 3.27457095  | -0.78541908 |
| C | -1.44524511 | 4.32302907  | 1.32066653  |
| C | -2.00481526 | 3.12301689  | 0.83672008  |
| H | 0.31557825  | 5.53961703  | 1.46759877  |
| H | -2.06692660 | 5.01668163  | 1.87893769  |
| H | -3.04731014 | 2.88016083  | 1.01362483  |
| C | -1.82934816 | 0.97529449  | -0.37697665 |
| C | 0.37130615  | 0.32628669  | -1.34626735 |
| N | -0.99122360 | 0.10966264  | -1.10364022 |
| O | 1.02892326  | -0.49478920 | -1.98460660 |
| O | -3.00620180 | 0.67860710  | -0.20798653 |
| C | -1.61553495 | -1.12748072 | -1.58708703 |
| H | -2.56709082 | -0.84723210 | -2.04142911 |
| H | -0.96189854 | -1.54430472 | -2.35327764 |
| C | -1.91594747 | -2.14993222 | -0.47481900 |
| H | -2.06236420 | -1.63407061 | 0.47754112  |
| H | -2.83044399 | -2.69267898 | -0.72888276 |

|    |             |             |             |
|----|-------------|-------------|-------------|
| N  | -0.87780915 | -3.16923406 | -0.26344707 |
| C  | -1.12055492 | -4.38728083 | 0.36472434  |
| C  | 0.44659249  | -2.92832245 | -0.21310962 |
| C  | 0.08092200  | -4.91316796 | 0.70876198  |
| H  | -2.12145743 | -4.76627973 | 0.49688225  |
| H  | 0.94585320  | -2.11922315 | -0.72013421 |
| H  | 0.33402007  | -5.84325485 | 1.19229869  |
| N  | 1.05570946  | -4.01796834 | 0.28835336  |
| C  | 2.46090937  | -4.02095410 | 0.68129521  |
| H  | 2.59007003  | -3.28138058 | 1.47886253  |
| H  | 2.72922553  | -5.02120600 | 1.02562548  |
| H  | 3.08556189  | -3.75675355 | -0.17549028 |
| Cl | 0.66016538  | -1.17006986 | 1.77129665  |

#### MNEI-Br

|   |             |             |             |
|---|-------------|-------------|-------------|
| C | 2.10232747  | 2.02726541  | -1.40724711 |
| C | 0.80017668  | 1.75390365  | -1.02641669 |
| C | 0.08737432  | 2.67010949  | -0.21322782 |
| C | 0.72164377  | 3.87419368  | 0.21654596  |
| C | 2.05746533  | 4.12148966  | -0.19461904 |
| C | 2.73147476  | 3.21772558  | -0.99059245 |
| H | 2.62650628  | 1.30529276  | -2.02398950 |
| C | -1.24603998 | 2.40161622  | 0.18341164  |
| C | -0.01084273 | 4.77091290  | 1.03738337  |
| H | 2.54532666  | 5.03676162  | 0.13151961  |
| H | 3.75455746  | 3.41668111  | -1.29534763 |
| C | -1.30822400 | 4.48777644  | 1.41420955  |
| C | -1.93075972 | 3.29777192  | 0.98596190  |
| H | 0.46946697  | 5.68783437  | 1.37010824  |
| H | -1.85523068 | 5.18047140  | 2.04674483  |
| H | -2.94851717 | 3.06192294  | 1.27856376  |
| C | -1.91523125 | 1.16215575  | -0.26100518 |
| C | 0.16169700  | 0.49802980  | -1.47013366 |
| N | -1.16799729 | 0.29309076  | -1.07954485 |
| O | 0.73969818  | -0.33173495 | -2.17127792 |
| O | -3.06902946 | 0.87311132  | 0.03165210  |

|    |             |             |             |
|----|-------------|-------------|-------------|
| C  | -1.85960240 | -0.92675456 | -1.51206186 |
| H  | -2.85335786 | -0.62640724 | -1.84688312 |
| H  | -1.30371796 | -1.33366395 | -2.35663471 |
| C  | -2.03495925 | -1.97102998 | -0.39197705 |
| H  | -1.99602020 | -1.48666157 | 0.58813921  |
| H  | -3.00371543 | -2.46345374 | -0.50644045 |
| N  | -1.02844848 | -3.04297255 | -0.38387958 |
| C  | -1.25402198 | -4.31158398 | 0.13637244  |
| C  | 0.30154963  | -2.85724342 | -0.47644216 |
| C  | -0.04566935 | -4.91321331 | 0.27723817  |
| H  | -2.24932014 | -4.66775384 | 0.34906085  |
| H  | 0.77715476  | -2.00548453 | -0.93460321 |
| H  | 0.21787862  | -5.89741052 | 0.63032266  |
| N  | 0.91364363  | -4.01097198 | -0.15841848 |
| C  | 2.35561121  | -4.11568980 | 0.04235761  |
| H  | 2.62487631  | -3.49440667 | 0.90365257  |
| H  | 2.61207260  | -5.16167389 | 0.21836794  |
| H  | 2.87894979  | -3.76142947 | -0.84876261 |
| Br | 0.85262661  | -1.21299002 | 1.81510148  |

# MNEI-I

|   |             |             |             |
|---|-------------|-------------|-------------|
| C | 1.27037490  | -2.21222756 | 2.20407855  |
| C | 0.22962907  | -1.95635046 | 1.32781804  |
| C | -0.04871784 | -2.85557205 | 0.26768960  |
| C | 0.75269318  | -4.02541847 | 0.10674592  |
| C | 1.80890575  | -4.25643532 | 1.02626625  |
| C | 2.06079078  | -3.36898537 | 2.05273453  |
| H | 1.46723665  | -1.50250209 | 3.00026121  |
| C | -1.10680601 | -2.60276924 | -0.64031385 |
| C | 0.46108667  | -4.90493565 | -0.96822239 |
| H | 2.42323203  | -5.14537277 | 0.90619759  |
| H | 2.87598795  | -3.55441974 | 2.74554827  |
| C | -0.57305722 | -4.63754079 | -1.84257112 |
| C | -1.36184419 | -3.48101889 | -1.67980279 |
| H | 1.07159189  | -5.79533234 | -1.09682686 |
| H | -0.78060036 | -5.31604201 | -2.66448395 |



|   |             |             |             |
|---|-------------|-------------|-------------|
| H | -2.17397826 | -3.25674612 | -2.36336850 |
| C | -1.94421412 | -1.39724832 | -0.48296937 |
| C | -0.58198529 | -0.73540628 | 1.50084772  |
| N | -1.63496641 | -0.54459616 | 0.59658012  |
| O | -0.37731786 | 0.08189140  | 2.39802711  |
| O | -2.87989603 | -1.11770785 | -1.22183393 |
| C | -2.49570496 | 0.63444912  | 0.74207405  |
| H | -3.52308550 | 0.29562608  | 0.60441011  |
| H | -2.37239499 | 1.00400996  | 1.75996453  |
| C | -2.21421046 | 1.73804135  | -0.29826007 |
| H | -1.68764703 | 1.32424122  | -1.16463095 |
| H | -3.15779498 | 2.17281624  | -0.63517246 |
| N | -1.40349809 | 2.85911229  | 0.20318835  |
| C | -1.50835164 | 4.16433756  | -0.25506952 |
| C | -0.24802267 | 2.74292059  | 0.88100927  |
| C | -0.43300977 | 4.84753850  | 0.21692134  |
| H | -2.33570480 | 4.48579765  | -0.86733890 |
| H | 0.07509047  | 1.86109118  | 1.41192224  |
| H | -0.14372973 | 5.87968699  | 0.09991268  |
| N | 0.32171446  | 3.95608582  | 0.96159147  |
| C | 1.67440051  | 4.17928974  | 1.46508403  |
| H | 2.38558141  | 3.77028081  | 0.73892428  |
| H | 1.82761436  | 5.25092911  | 1.60193027  |
| H | 1.79502623  | 3.67148085  | 2.42405490  |
| I | 1.60123245  | 1.34459482  | -1.31046096 |

#### 4.2 S<sub>MI</sub> Min

MNEI-F

|   |             |            |             |
|---|-------------|------------|-------------|
| C | 2.34872988  | 1.72378747 | -0.58386573 |
| C | 0.97327353  | 1.51509638 | -0.54285573 |
| C | 0.10798460  | 2.53785102 | -0.08575580 |
| C | 0.65140856  | 3.78903283 | 0.32778105  |
| C | 2.05547496  | 3.97134419 | 0.26558181  |
| C | 2.88742036  | 2.95434950 | -0.18054604 |
| H | 2.98734103  | 0.91511640 | -0.92066083 |
| C | -1.28570226 | 2.32128120 | -0.01151240 |

|         |             |             |             |
|---------|-------------|-------------|-------------|
| C       | -0.23361060 | 4.78983498  | 0.79988317  |
| H       | 2.47758202  | 4.92079682  | 0.58481664  |
| H       | 3.96186513  | 3.10575785  | -0.20797168 |
| C       | -1.59953023 | 4.55767415  | 0.86300689  |
| C       | -2.12810883 | 3.32088126  | 0.46157634  |
| H       | 0.17459530  | 5.74293409  | 1.12602007  |
| H       | -2.26411653 | 5.33029149  | 1.23664776  |
| H       | -3.19147198 | 3.11724976  | 0.52509656  |
| C       | -1.85522699 | 1.01724744  | -0.40691775 |
| C       | 0.42683745  | 0.20995902  | -0.95705349 |
| N       | -0.94914714 | 0.04805848  | -0.89323246 |
| O       | 1.15974075  | -0.68869459 | -1.39591974 |
| O       | -3.04814719 | 0.75886137  | -0.36248584 |
| C       | -1.53363868 | -1.24353639 | -1.23259948 |
| H       | -2.48192887 | -1.05274557 | -1.73836634 |
| H       | -0.86109574 | -1.76261343 | -1.91581996 |
| C       | -1.84651882 | -2.11804891 | -0.01711618 |
| H       | -1.79951197 | -1.61891908 | 0.95570919  |
| H       | -2.73138280 | -2.74438951 | -0.14535350 |
| N       | -0.72913351 | -3.25936258 | 0.12796681  |
| C       | -0.95264477 | -4.58464877 | 0.41961938  |
| C       | 0.61001322  | -3.06691500 | 0.08443798  |
| C       | 0.24509903  | -5.23089906 | 0.53205497  |
| H       | -1.95259362 | -4.98099873 | 0.52761875  |
| H       | 1.07647234  | -2.15791586 | -0.33756541 |
| H       | 0.48401051  | -6.26400315 | 0.73477808  |
| N       | 1.22998479  | -4.27927605 | 0.28087860  |
| C       | 2.64859758  | -4.43920162 | 0.52289819  |
| H       | 2.91253897  | -4.20561067 | 1.56396378  |
| H       | 2.94319385  | -5.46905694 | 0.30148494  |
| H       | 3.20549416  | -3.76633128 | -0.13579247 |
| F       | -0.28819920 | -0.09896891 | 1.97890755  |
| MNEI-CI |             |             |             |
| C       | 2.23301884  | 2.02565750  | -1.18149980 |
| C       | 0.91683586  | 1.71783991  | -0.88390027 |

|   |              |              |              |
|---|--------------|--------------|--------------|
| C | 0. 12046425  | 2. 63306529  | -0. 15098540 |
| C | 0. 68152280  | 3. 87273509  | 0. 28234309  |
| C | 2. 03521684  | 4. 15330322  | -0. 04072708 |
| C | 2. 79257253  | 3. 24902140  | -0. 75755584 |
| H | 2. 81964765  | 1. 30740270  | -1. 74462372 |
| C | -1. 22895058 | 2. 32757213  | 0. 15487277  |
| C | -0. 14076083 | 4. 76887266  | 1. 01476899  |
| H | 2. 46833725  | 5. 09573006  | 0. 28581087  |
| H | 3. 82690636  | 3. 47574648  | -0. 99906409 |
| C | -1. 45303906 | 4. 45109916  | 1. 30168734  |
| C | -2. 00182783 | 3. 22540764  | 0. 87037753  |
| H | 0. 28048129  | 5. 71435229  | 1. 34790132  |
| H | -2. 07105797 | 5. 14596872  | 1. 86269017  |
| H | -3. 03217220 | 2. 96483802  | 1. 08928646  |
| C | -1. 82303734 | 1. 04583572  | -0. 29395430 |
| C | 0. 34960520  | 0. 42536964  | -1. 34058256 |
| N | -0. 98930840 | 0. 16830586  | -1. 00822942 |
| O | 1. 00892419  | -0. 38715094 | -1. 97941307 |
| O | -2. 98732253 | 0. 74127011  | -0. 06764165 |
| C | -1. 61299305 | -1. 08612452 | -1. 47153559 |
| H | -2. 58619994 | -0. 81094963 | -1. 88128649 |
| H | -0. 98182412 | -1. 48623875 | -2. 26390966 |
| C | -1. 81677629 | -2. 14436352 | -0. 36412464 |
| H | -1. 93635743 | -1. 64485498 | 0. 60675355  |
| H | -2. 75630207 | -2. 66554341 | -0. 57263765 |
| N | -0. 78446547 | -3. 16643010 | -0. 32701906 |
| C | -1. 07873175 | -4. 46546838 | 0. 15347100  |
| C | 0. 56107408  | -2. 85830214 | 0. 11846698  |
| C | 0. 06851186  | -5. 06748877 | 0. 50036404  |
| H | -2. 08467850 | -4. 85695800 | 0. 11410184  |
| H | 1. 10216391  | -2. 24258573 | -0. 60022258 |
| H | 0. 25158717  | -6. 08330230 | 0. 81880135  |
| N | 1. 13658294  | -4. 17797618 | 0. 25260826  |
| C | 2. 42313619  | -4. 33660096 | 0. 89475298  |
| H | 2. 41297902  | -4. 06650224 | 1. 96190358  |
| H | 2. 74001530  | -5. 37979273 | 0. 79651560  |

|    |             |              |             |
|----|-------------|--------------|-------------|
| H  | 3. 16545469 | -3. 70972537 | 0. 38891001 |
| Cl | 0. 59379166 | -1. 90173661 | 1. 67940135 |

MNEI-Br

|   |              |              |              |
|---|--------------|--------------|--------------|
| C | 2. 17030800  | 1. 90387753  | -1. 08790139 |
| C | 0. 81213650  | 1. 71687233  | -0. 83970704 |
| C | 0. 05135946  | 2. 73530258  | -0. 21527390 |
| C | 0. 68282741  | 3. 95747154  | 0. 15775072  |
| C | 2. 06323515  | 4. 11823935  | -0. 11731615 |
| C | 2. 79265342  | 3. 10691392  | -0. 72794714 |
| H | 2. 73034184  | 1. 09868050  | -1. 54958457 |
| C | -1. 31616115 | 2. 53703956  | 0. 07988251  |
| C | -0. 09104971 | 4. 94931365  | 0. 80925726  |
| H | 2. 55261670  | 5. 04483982  | 0. 17098213  |
| H | 3. 85317142  | 3. 24063773  | -0. 91521548 |
| C | -1. 43387061 | 4. 73623412  | 1. 08663279  |
| C | -2. 04819407 | 3. 52739777  | 0. 72785227  |
| H | 0. 38674183  | 5. 87911107  | 1. 10637571  |
| H | -2. 00960153 | 5. 50030924  | 1. 59898320  |
| H | -3. 09008978 | 3. 33614110  | 0. 96019059  |
| C | -1. 97036426 | 1. 26033203  | -0. 26722958 |
| C | 0. 17821842  | 0. 44043929  | -1. 21622198 |
| N | -1. 17293798 | 0. 29262805  | -0. 92463860 |
| O | 0. 80608916  | -0. 44514677 | -1. 81210387 |
| O | -3. 14538708 | 1. 01561328  | -0. 04238750 |
| C | -1. 85000910 | -0. 95548333 | -1. 26529598 |
| H | -2. 85516593 | -0. 70125520 | -1. 60539758 |
| H | -1. 30607934 | -1. 43677733 | -2. 07848883 |
| C | -2. 00438030 | -1. 91439796 | -0. 08174306 |
| H | -1. 77211691 | -1. 49652573 | 0. 90344452  |
| H | -2. 93248794 | -2. 48830781 | -0. 09543443 |
| N | -0. 93888624 | -3. 09767434 | -0. 20659592 |
| C | -1. 15695080 | -4. 42661810 | 0. 07744901  |
| C | 0. 38340192  | -2. 94364549 | -0. 46489470 |
| C | 0. 02005415  | -5. 10871555 | -0. 03070478 |
| H | -2. 13765782 | -4. 79832709 | 0. 33920251  |

|    |            |             |             |
|----|------------|-------------|-------------|
| H  | 0.80606271 | -2.02878259 | -0.92052973 |
| H  | 0.25297429 | -6.15459167 | 0.10070305  |
| N  | 0.98382085 | -4.17977310 | -0.41011158 |
| C  | 2.41805204 | -4.38707741 | -0.39204541 |
| H  | 2.84330433 | -4.17650512 | 0.59864632  |
| H  | 2.63982021 | -5.42193297 | -0.66693412 |
| H  | 2.88894305 | -3.72214688 | -1.12201707 |
| Br | 0.16663038 | 0.03187679  | 2.44557661  |

#### MNEI-I

|   |             |             |             |
|---|-------------|-------------|-------------|
| C | 1.89211171  | -1.97685044 | 1.64078677  |
| C | 0.59933078  | -1.79377290 | 1.15388284  |
| C | 0.01726275  | -2.75162518 | 0.28919859  |
| C | 0.76482519  | -3.90503106 | -0.08800533 |
| C | 2.07305698  | -4.06481744 | 0.43145869  |
| C | 2.62492667  | -3.11624329 | 1.28185678  |
| H | 2.31696668  | -1.21660322 | 2.28655019  |
| C | -1.27799627 | -2.55403243 | -0.24202977 |
| C | 0.17808255  | -4.82858610 | -0.98776736 |
| H | 2.65085503  | -4.93854540 | 0.14218776  |
| H | 3.63422957  | -3.24678023 | 1.65840861  |
| C | -1.09573570 | -4.61671199 | -1.49705495 |
| C | -1.82543144 | -3.47767375 | -1.12828863 |
| H | 0.74790933  | -5.70290439 | -1.29060562 |
| H | -1.52395439 | -5.32571496 | -2.19806677 |
| H | -2.81189249 | -3.28619736 | -1.53595391 |
| C | -2.04346387 | -1.34307856 | 0.10908542  |
| C | -0.14354620 | -0.57529985 | 1.52147341  |
| N | -1.42342760 | -0.43045853 | 0.99387489  |
| O | 0.32838835  | 0.26941285  | 2.29319918  |
| O | -3.16849031 | -1.10295327 | -0.30322352 |
| C | -2.21123992 | 0.75581544  | 1.32437408  |
| H | -3.23463995 | 0.43084845  | 1.52400142  |
| H | -1.79743248 | 1.20810759  | 2.22617457  |
| C | -2.28820834 | 1.77662767  | 0.19415937  |
| H | -2.00397736 | 1.41368666  | -0.79915806 |

|   |              |             |              |
|---|--------------|-------------|--------------|
| H | -3. 20699219 | 2. 36529150 | 0. 19381446  |
| N | -1. 20360357 | 2. 93741444 | 0. 42453475  |
| C | -1. 29620530 | 4. 22586664 | -0. 05825491 |
| C | 0. 08001566  | 2. 74475807 | 0. 81831058  |
| C | -0. 08460703 | 4. 83910333 | 0. 06145192  |
| H | -2. 22134168 | 4. 61883170 | -0. 45672727 |
| H | 0. 41564335  | 1. 86898963 | 1. 40296572  |
| H | 0. 23613824  | 5. 83860115 | -0. 19141567 |
| N | 0. 77480828  | 3. 91722273 | 0. 64790159  |
| C | 2. 22382423  | 4. 00168466 | 0. 66894887  |
| H | 2. 65764726  | 3. 54263875 | -0. 22887010 |
| H | 2. 52459737  | 5. 05118831 | 0. 72524612  |
| H | 2. 60613296  | 3. 47932165 | 1. 55153177  |
| I | 0. 58290948  | 0. 19870923 | -2. 34153126 |

#### 4.3 S<sub>ET</sub> Min

MNEI-F

|   |              |              |              |
|---|--------------|--------------|--------------|
| C | 2. 37721504  | 1. 76986156  | -0. 82086011 |
| C | 1. 03375248  | 1. 47931340  | -0. 66238344 |
| C | 0. 17960169  | 2. 39803188  | -0. 00320798 |
| C | 0. 70775202  | 3. 63220490  | 0. 48141748  |
| C | 2. 09020036  | 3. 89641650  | 0. 29948924  |
| C | 2. 90685449  | 2. 98283694  | -0. 33514562 |
| H | 3. 01057353  | 1. 04698532  | -1. 32354354 |
| C | -1. 19667187 | 2. 11227085  | 0. 16624820  |
| C | -0. 17401671 | 4. 54521130  | 1. 11680249  |
| H | 2. 49794004  | 4. 83427128  | 0. 66924678  |
| H | 3. 96402953  | 3. 19554146  | -0. 46450819 |
| C | -1. 51300732 | 4. 24708930  | 1. 26761694  |
| C | -2. 02785443 | 3. 02311700  | 0. 79374054  |
| H | 0. 22329219  | 5. 48868604  | 1. 48357244  |
| H | -2. 17715979 | 4. 95450237  | 1. 75550432  |
| H | -3. 07745390 | 2. 77503646  | 0. 91082554  |
| C | -1. 75887938 | 0. 84912296  | -0. 34974871 |
| C | 0. 49491723  | 0. 21356027  | -1. 19908319 |
| N | -0. 87224893 | -0. 01674865 | -1. 02215031 |

|   |             |             |             |
|---|-------------|-------------|-------------|
| O | 1.19239344  | -0.59743079 | -1.81294272 |
| O | -2.94474451 | 0.55352406  | -0.26957518 |
| C | -1.47456010 | -1.22540413 | -1.58653874 |
| H | -2.38640163 | -0.91876497 | -2.10365284 |
| H | -0.77575792 | -1.62839191 | -2.32013985 |
| C | -1.90484112 | -2.27493898 | -0.55519397 |
| H | -2.29479876 | -1.77591917 | 0.33228199  |
| H | -2.69307814 | -2.89396153 | -0.99619391 |
| N | -0.84685377 | -3.19673049 | -0.09889701 |
| C | -1.07436934 | -4.21881660 | 0.80362378  |
| C | 0.46803505  | -3.08661807 | -0.29188720 |
| C | 0.13715045  | -4.72818987 | 1.15005312  |
| H | -2.06951196 | -4.48406729 | 1.12282608  |
| H | 0.95321749  | -2.32048649 | -0.88691123 |
| H | 0.40489473  | -5.52493881 | 1.82550281  |
| N | 1.08824153  | -4.00850419 | 0.45124896  |
| C | 2.53112428  | -4.04798698 | 0.67928141  |
| H | 2.77833601  | -3.37816688 | 1.50640674  |
| H | 2.82885334  | -5.07253148 | 0.91212316  |
| H | 3.04572482  | -3.72115758 | -0.22579418 |
| F | 0.17594723  | -1.05576838 | 1.73738132  |

# MNEI-CI

|   |             |            |             |
|---|-------------|------------|-------------|
| C | 2.23301884  | 2.02565750 | -1.18149980 |
| C | 0.91683586  | 1.71783991 | -0.88390027 |
| C | 0.12046425  | 2.63306529 | -0.15098540 |
| C | 0.68152280  | 3.87273509 | 0.28234309  |
| C | 2.03521684  | 4.15330322 | -0.04072708 |
| C | 2.79257253  | 3.24902140 | -0.75755584 |
| H | 2.81964765  | 1.30740270 | -1.74462372 |
| C | -1.22895058 | 2.32757213 | 0.15487277  |
| C | -0.14076083 | 4.76887266 | 1.01476899  |
| H | 2.46833725  | 5.09573006 | 0.28581087  |
| H | 3.82690636  | 3.47574648 | -0.99906409 |
| C | -1.45303906 | 4.45109916 | 1.30168734  |
| C | -2.00182783 | 3.22540764 | 0.87037753  |

|    |             |             |             |
|----|-------------|-------------|-------------|
| H  | 0.28048129  | 5.71435229  | 1.34790132  |
| H  | -2.07105797 | 5.14596872  | 1.86269017  |
| H  | -3.03217220 | 2.96483802  | 1.08928646  |
| C  | -1.82303734 | 1.04583572  | -0.29395430 |
| C  | 0.34960520  | 0.42536964  | -1.34058256 |
| N  | -0.98930840 | 0.16830586  | -1.00822942 |
| O  | 1.00892419  | -0.38715094 | -1.97941307 |
| O  | -2.98732253 | 0.74127011  | -0.06764165 |
| C  | -1.61299305 | -1.08612452 | -1.47153559 |
| H  | -2.58619994 | -0.81094963 | -1.88128649 |
| H  | -0.98182412 | -1.48623875 | -2.26390966 |
| C  | -1.81677629 | -2.14436352 | -0.36412464 |
| H  | -1.93635743 | -1.64485498 | 0.60675355  |
| H  | -2.75630207 | -2.66554341 | -0.57263765 |
| N  | -0.78446547 | -3.16643010 | -0.32701906 |
| C  | -1.07873175 | -4.46546838 | 0.15347100  |
| C  | 0.56107408  | -2.85830214 | 0.11846698  |
| C  | 0.06851186  | -5.06748877 | 0.50036404  |
| H  | -2.08467850 | -4.85695800 | 0.11410184  |
| H  | 1.10216391  | -2.24258573 | -0.60022258 |
| H  | 0.25158717  | -6.08330230 | 0.81880135  |
| N  | 1.13658294  | -4.17797618 | 0.25260826  |
| C  | 2.42313619  | -4.33660096 | 0.89475298  |
| H  | 2.41297902  | -4.06650224 | 1.96190358  |
| H  | 2.74001530  | -5.37979273 | 0.79651560  |
| H  | 3.16545469  | -3.70972537 | 0.38891001  |
| Cl | 0.59379166  | -1.90173661 | 1.67940135  |

#### MNEI-Br

|   |            |            |             |
|---|------------|------------|-------------|
| C | 2.07259265 | 2.17034945 | -1.41686684 |
| C | 0.77680819 | 1.88126831 | -1.02504045 |
| C | 0.05226402 | 2.80325330 | -0.22828461 |
| C | 0.66304929 | 4.03195190 | 0.16759624  |
| C | 1.99424162 | 4.29258551 | -0.25144924 |
| C | 2.68253805 | 3.38065507 | -1.02594662 |
| H | 2.60419582 | 1.44720241 | -2.02639383 |



|    |              |              |              |
|----|--------------|--------------|--------------|
| C  | -1. 27372439 | 2. 51462293  | 0. 18015954  |
| C  | -0. 08854302 | 4. 93690308  | 0. 96215852  |
| H  | 2. 46592971  | 5. 22532175  | 0. 04848886  |
| H  | 3. 70126940  | 3. 59083974  | -1. 33820234 |
| C  | -1. 38027730 | 4. 63750149  | 1. 34537310  |
| C  | -1. 97708745 | 3. 42065287  | 0. 95479484  |
| H  | 0. 37103690  | 5. 87436896  | 1. 26593914  |
| H  | -1. 94428095 | 5. 33896688  | 1. 95314605  |
| H  | -2. 99055732 | 3. 17223003  | 1. 25265821  |
| C  | -1. 91373372 | 1. 23739742  | -0. 21520500 |
| C  | 0. 15512326  | 0. 60212730  | -1. 44823112 |
| N  | -1. 15369440 | 0. 35778045  | -1. 00344728 |
| O  | 0. 74414190  | -0. 20829907 | -2. 15459166 |
| O  | -3. 05342759 | 0. 93689035  | 0. 11782343  |
| C  | -1. 81602627 | -0. 90064811 | -1. 39405111 |
| H  | -2. 82548865 | -0. 63364538 | -1. 70964718 |
| H  | -1. 26434845 | -1. 30419612 | -2. 24173862 |
| C  | -1. 89352886 | -1. 94883863 | -0. 25647030 |
| H  | -1. 77875945 | -1. 44681588 | 0. 71462726  |
| H  | -2. 89124944 | -2. 39670544 | -0. 27058348 |
| N  | -0. 94785376 | -3. 03837631 | -0. 40604773 |
| C  | -1. 24670683 | -4. 33868422 | 0. 05928840  |
| C  | 0. 47400232  | -2. 84064978 | -0. 20753820 |
| C  | -0. 10141669 | -5. 03210929 | 0. 16195629  |
| H  | -2. 26894896 | -4. 66087527 | 0. 19301574  |
| H  | 0. 91941378  | -2. 21891832 | -0. 98372121 |
| H  | 0. 06202005  | -6. 07249325 | 0. 40230004  |
| N  | 0. 96351829  | -4. 19926991 | -0. 23652318 |
| C  | 2. 33630607  | -4. 48649799 | 0. 11007756  |
| H  | 2. 57184249  | -4. 26414623 | 1. 16240117  |
| H  | 2. 53578125  | -5. 54523240 | -0. 08345707 |
| H  | 3. 00698868  | -3. 89510852 | -0. 52279933 |
| Br | 0. 90796245  | -1. 87577227 | 1. 50164083  |

## MNEI-I

|   |              |              |              |
|---|--------------|--------------|--------------|
| C | 1. 86028929  | -2. 32551431 | 1. 68793034  |
| C | 0. 61894752  | -2. 03667110 | 1. 14821257  |
| C | -0. 01063166 | -2. 96118542 | 0. 27696557  |
| C | 0. 64057287  | -4. 19151469 | -0. 04166244 |
| C | 1. 91285535  | -4. 45293043 | 0. 53123938  |
| C | 2. 50825735  | -3. 53900895 | 1. 37687177  |
| H | 2. 31979874  | -1. 59980041 | 2. 35059589  |
| C | -1. 28031413 | -2. 67376986 | -0. 28327970 |
| C | -0. 01394672 | -5. 09765217 | -0. 91688930 |
| H | 2. 41380598  | -5. 38787264 | 0. 29240920  |
| H | 3. 48248447  | -3. 75041384 | 1. 80757459  |
| C | -1. 25123634 | -4. 79776791 | -1. 45017760 |
| C | -1. 88859796 | -3. 58000659 | -1. 13407726 |
| H | 0. 47687076  | -6. 03614924 | -1. 16288291 |
| H | -1. 74046690 | -5. 49981801 | -2. 11881483 |
| H | -2. 85984314 | -3. 33142993 | -1. 54900205 |
| C | -1. 96267921 | -1. 39737695 | 0. 03512734  |
| C | -0. 04503741 | -0. 75532276 | 1. 49118736  |
| N | -1. 30203742 | -0. 52119524 | 0. 91204214  |
| O | 0. 46449802  | 0. 06474126  | 2. 24685385  |
| O | -3. 05409949 | -1. 09363561 | -0. 42990521 |
| C | -2. 00656824 | 0. 73391238  | 1. 22695897  |
| H | -3. 04559455 | 0. 46668796  | 1. 42351161  |
| H | -1. 55636497 | 1. 13413167  | 2. 13382796  |
| C | -1. 94542826 | 1. 78648783  | 0. 08921417  |
| H | -1. 60674903 | 1. 30446596  | -0. 84039314 |
| H | -2. 95302410 | 2. 16948870  | -0. 09234339 |
| N | -1. 10745422 | 2. 92331280  | 0. 40416150  |
| C | -1. 43361828 | 4. 23765068  | 0. 01787207  |
| C | 0. 33217584  | 2. 82881242  | 0. 41035584  |
| C | -0. 33621359 | 5. 00416801  | 0. 14427441  |
| H | -2. 44595813 | 4. 50865194  | -0. 24237518 |
| H | 0. 71196757  | 2. 15365187  | 1. 17587068  |
| H | -0. 21295025 | 6. 06905457  | 0. 01440029  |
| N | 0. 71523766  | 4. 19953168  | 0. 61927428  |

|   |             |             |              |
|---|-------------|-------------|--------------|
| C | 2. 09973557 | 4. 60004217 | 0. 54613779  |
| H | 2. 53293359 | 4. 43775565 | -0. 45346053 |
| H | 2. 17704242 | 5. 66014882 | 0. 80546962  |
| H | 2. 69023549 | 4. 02804906 | 1. 27020936  |
| I | 1. 16858187 | 1. 94853073 | -1. 50485983 |

## References

- S1. T. Otsuka, M. Sumita, H. Izawa, K. Morihasi, *Phys. Chem. Chem. Phys.*, 18, 17795-17798 (2016).
